# Supplementary material
Source: publisher site journal article supplement (https://www.dovepress.com/get_supplementary_file.php?f=460767.docx)
Supplement: Supplementary file 1 [file get_supplementary_file.php]

**[Supplementary Materials](https://www.ncbi.nlm.nih.gov/pmc/articles/PMC6484695/)**

**Mesoporous graphene oxide nanocomposite effective for combined chemo/photo therapy against Non-Small Cell Lung Cancer**

**Peigang Zhang3*, Lingling Zheng1,4,*, Xiaorui** **Zhang2, Miao Liu2, Mingli Li3, Mengting Zhang2, Jianlin Wu4, Martin M.F. Choi5, Wei Bian1,2,3**

1 Key Laboratory of Cellular Physiology at Shanxi Medical University, Ministry of Education, Taiyuan, Shanxi, 030000, People’s Republic of China; 2 Department of Medical Chemistry, School of Basic Medical Science, Shanxi Medical University, Taiyuan, Shanxi, 030000, People’s Republic of China; 3 Department of Cardiothoracic Surgery,People’s Hospital of Lvliang, Lvliang, Shanxi, 033099, People’s Republic of China; 4 State Key Laboratory for Quality Research of Chinese Medicines, Macau University of Science and Technology, Taipa, Macao, People’s Republic of China; 5 Department of Chemistry, The Hong Kong University of Science and Technology, Clear Water Bay, Kowloon, Hong Kong SAR, People's Republic of China.

Correspondence: **Wei Bian**

Key Laboratory of Cellular Physiology at Shanxi Medical University, Ministry of Education, 030000, Taiyuan, Shanxi, People’s Republic of China. E-mail: weibian@sxmu.edu.cn

*These authors contributed equally to this work


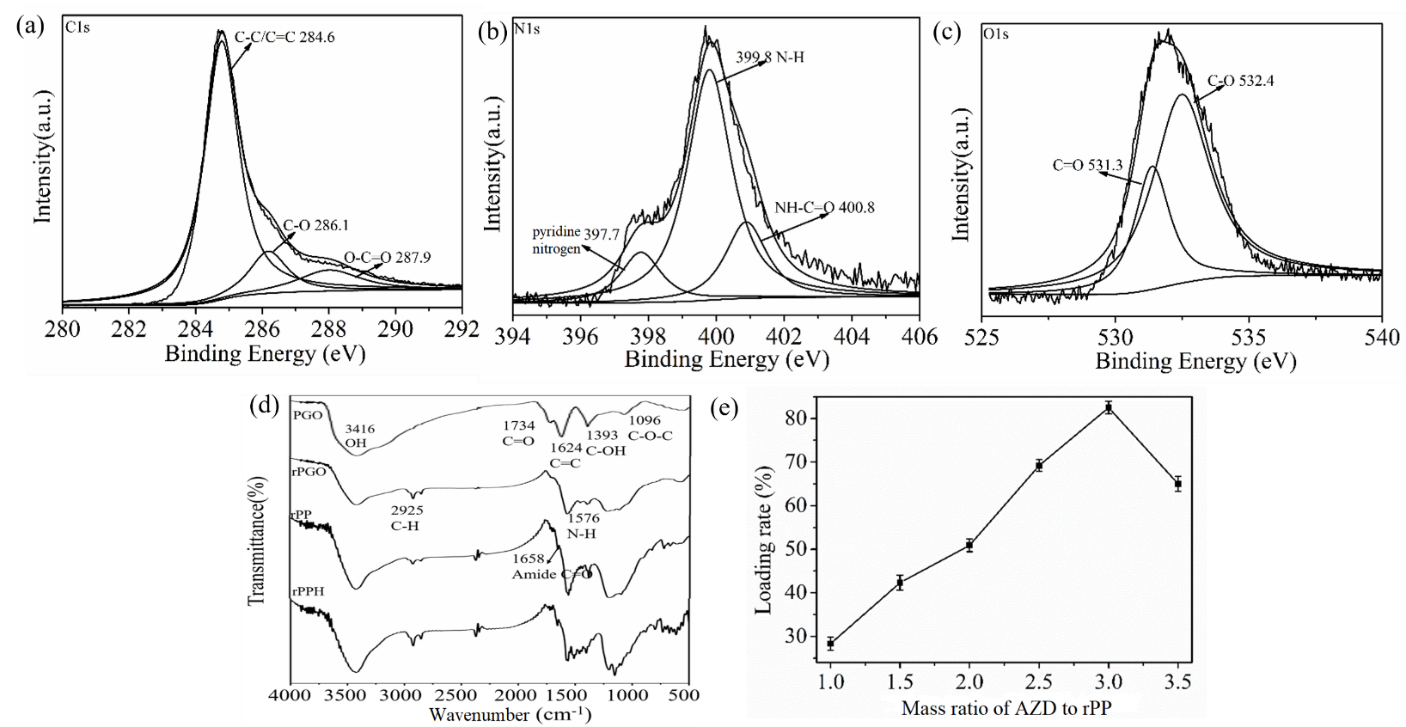


**Fig. S1.** XPS fine spectrum of rPPH@AZD: (a) C1s, (b) N1s, and (c) O1s. (d) FT-IR spectra of PGO, rPGO, rPP, and rPPH. (e) Loading rate of rPP at different mass ratios of AZD to rPP.


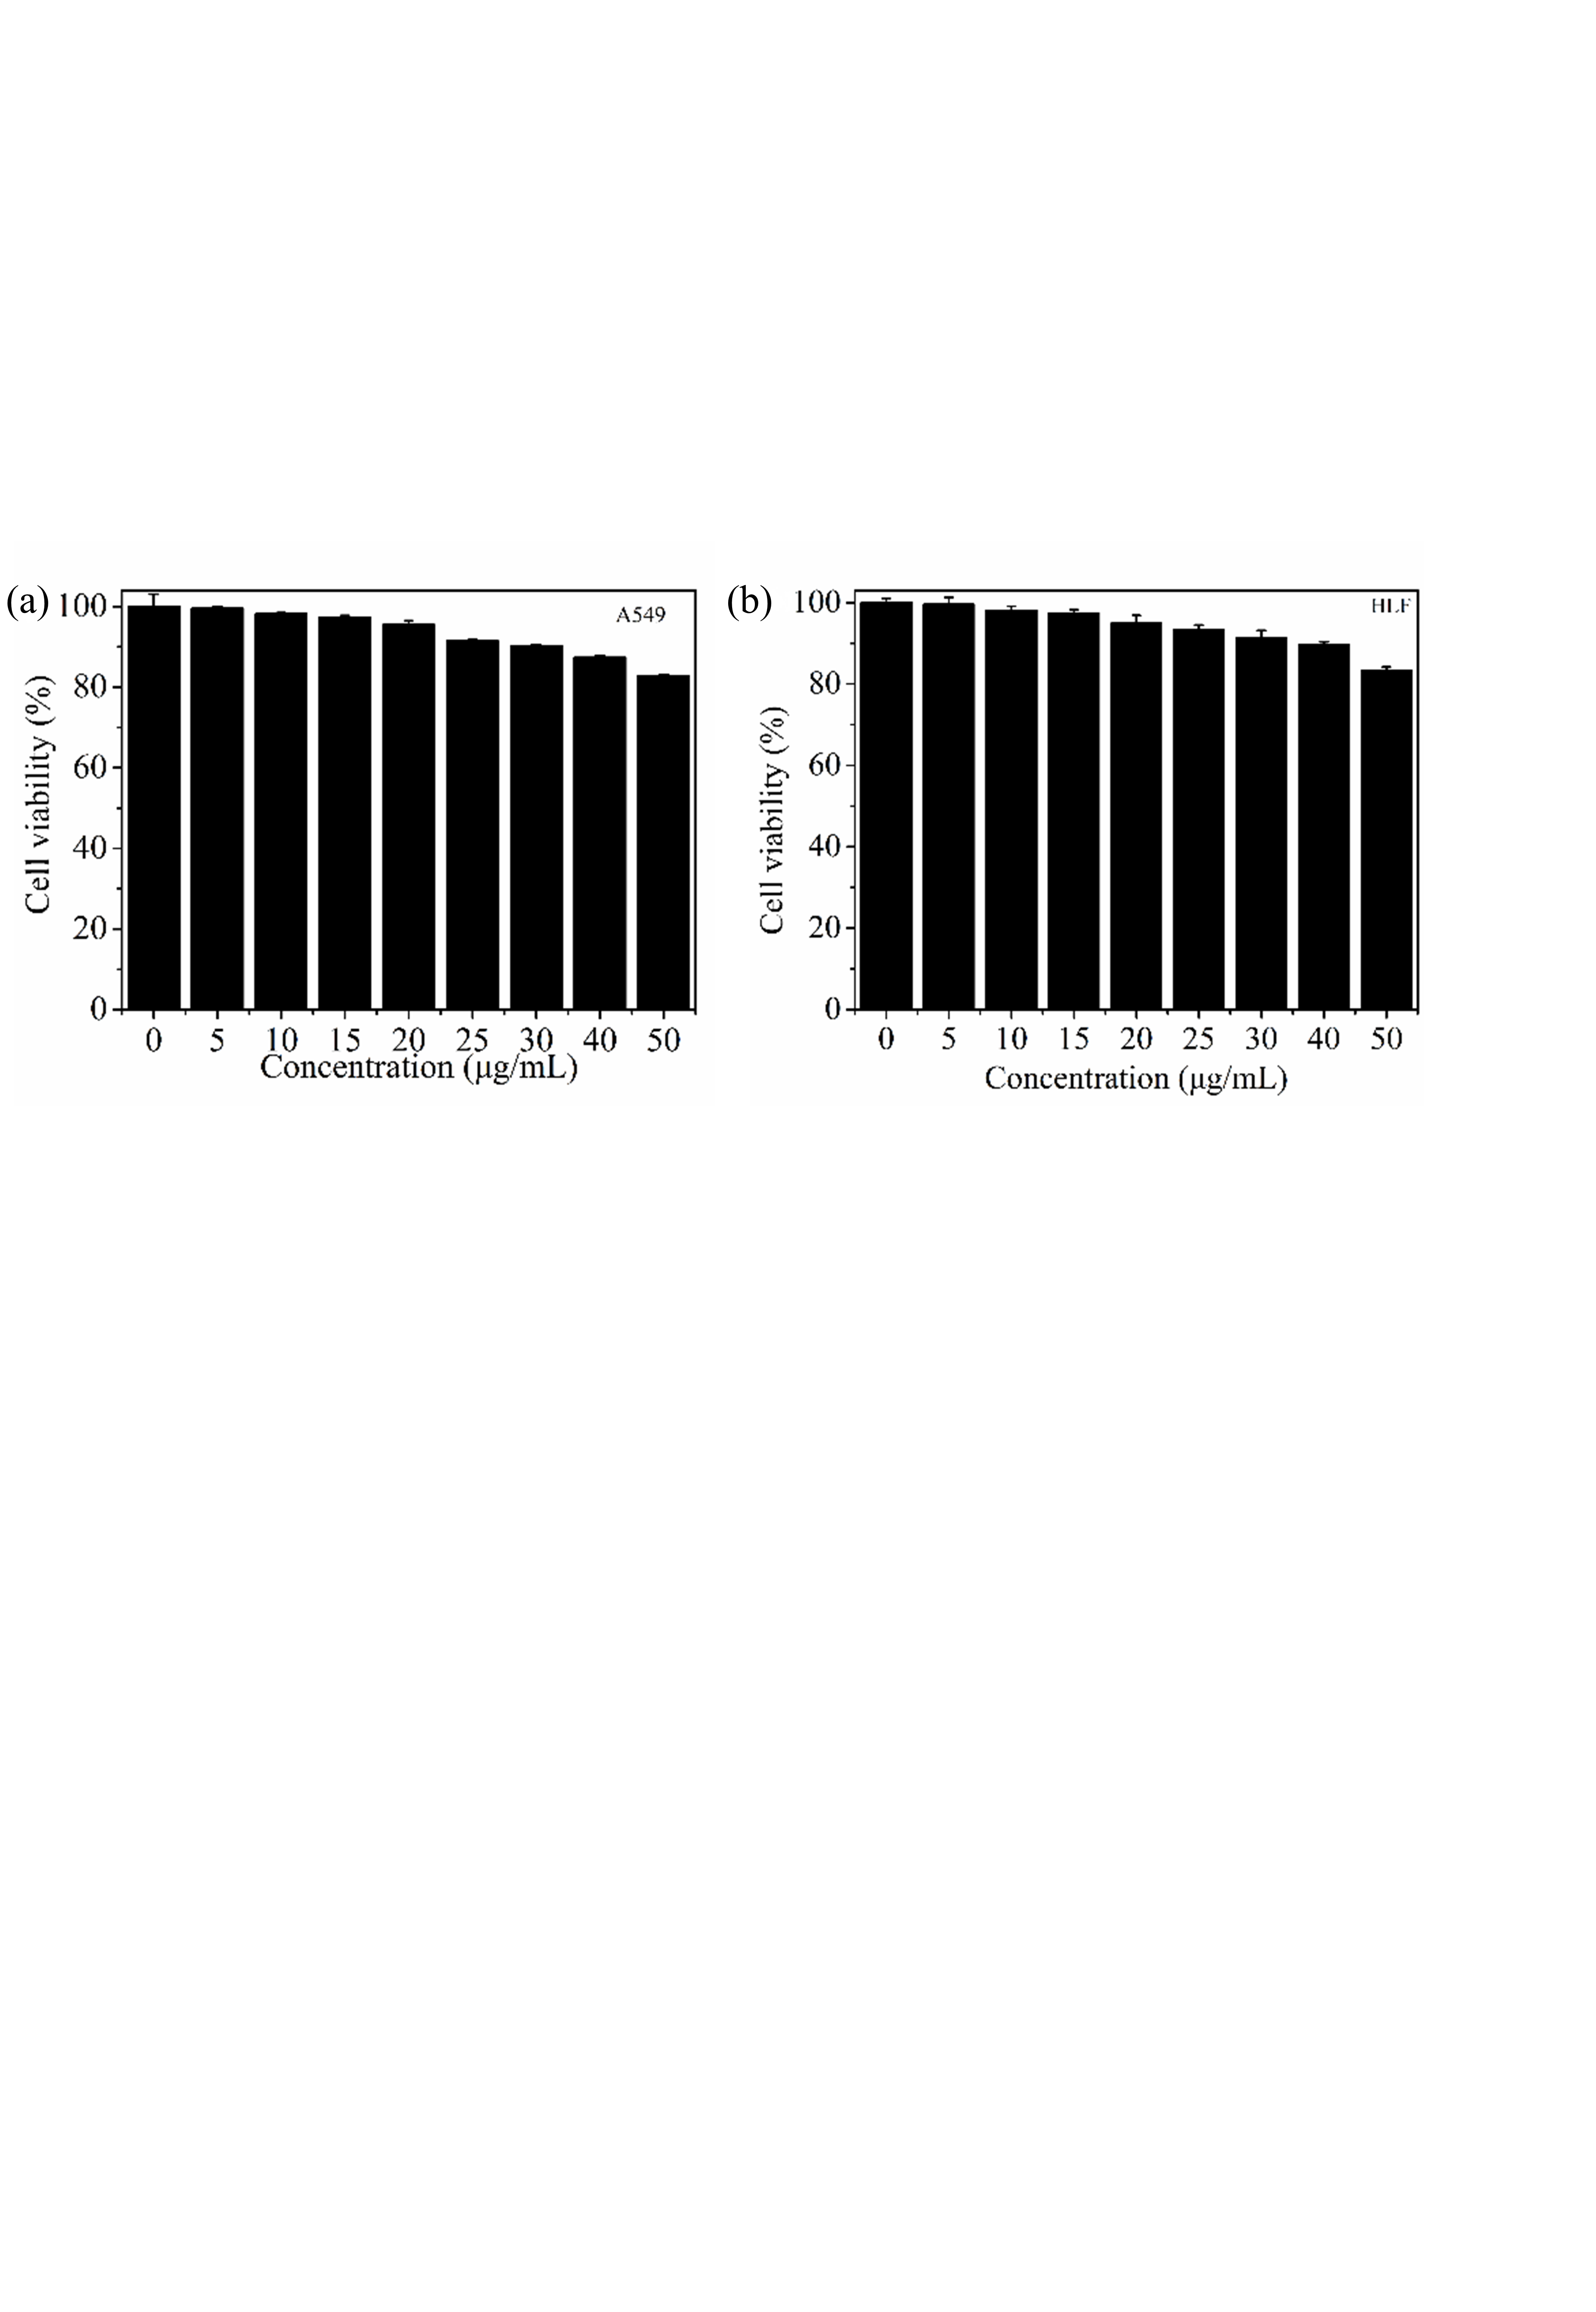


**Fig. S2.** The cell viability of (a) A549 cells and (b) HLF cells incubated with various concentrations of rPPH for 24h.


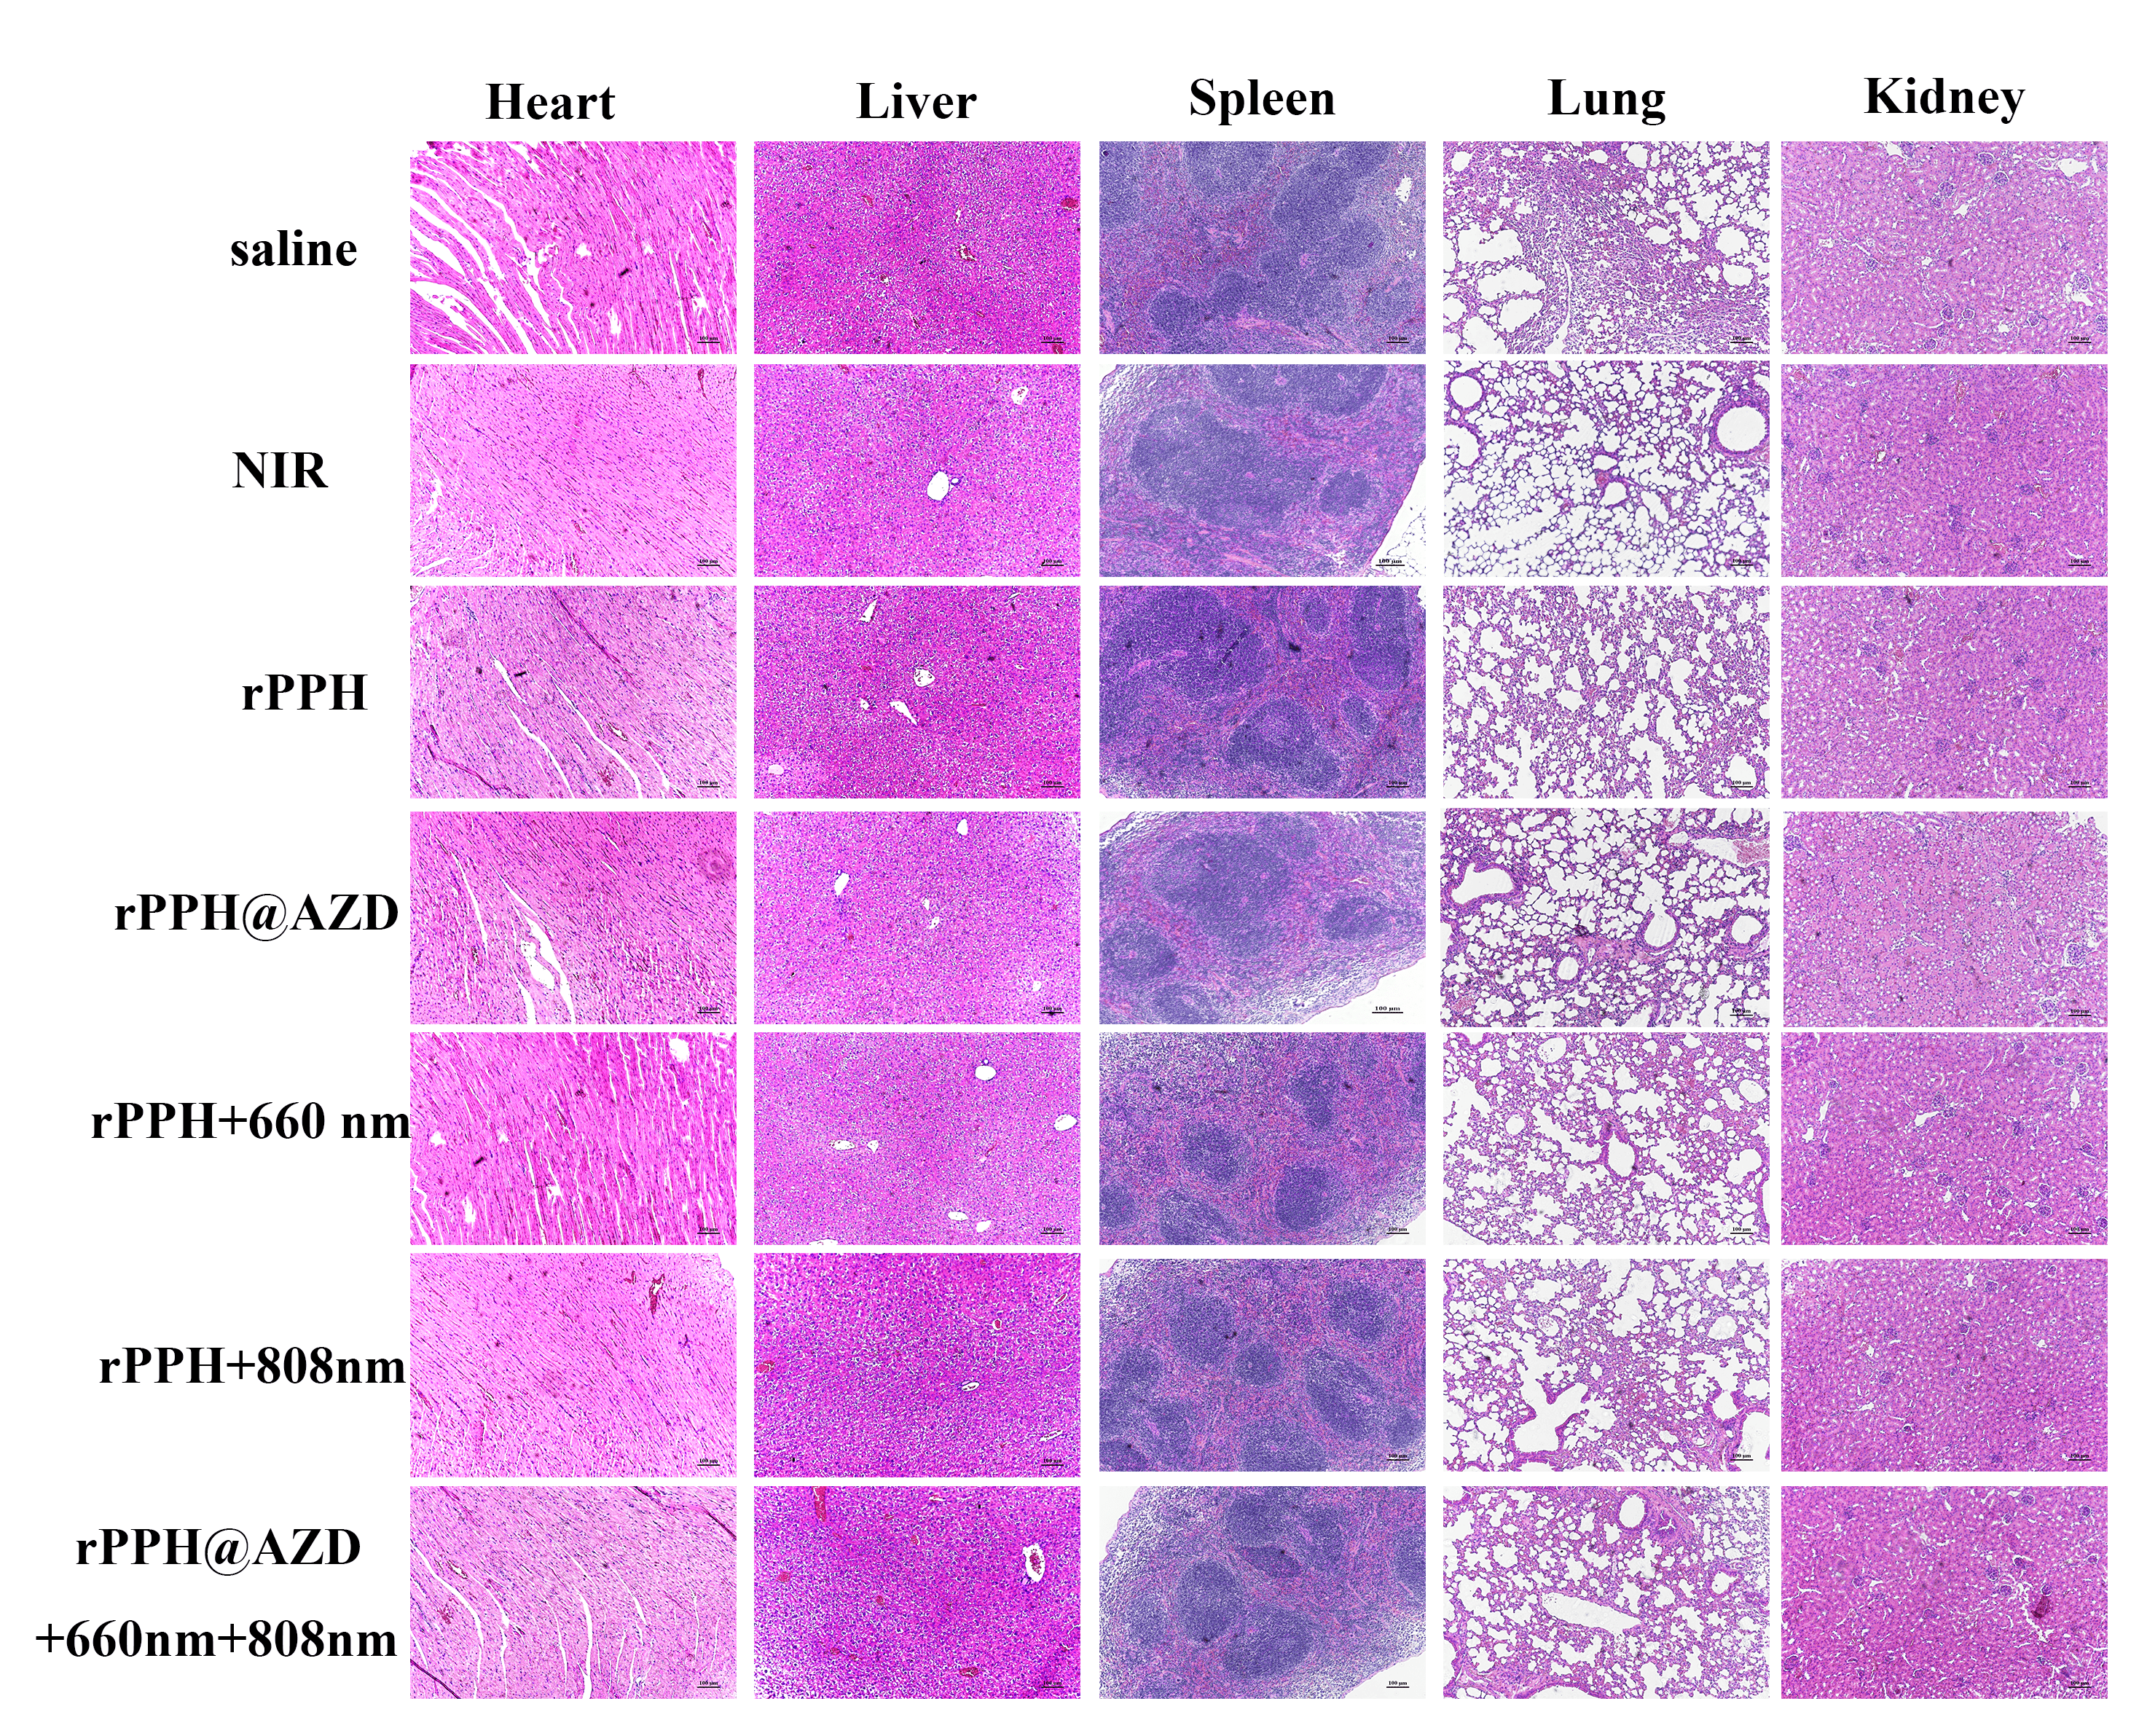


**Fig. S3.** H&E staining images of heart, liver, spleen, lung, and kidney tissues of mice subjected to various treatments.


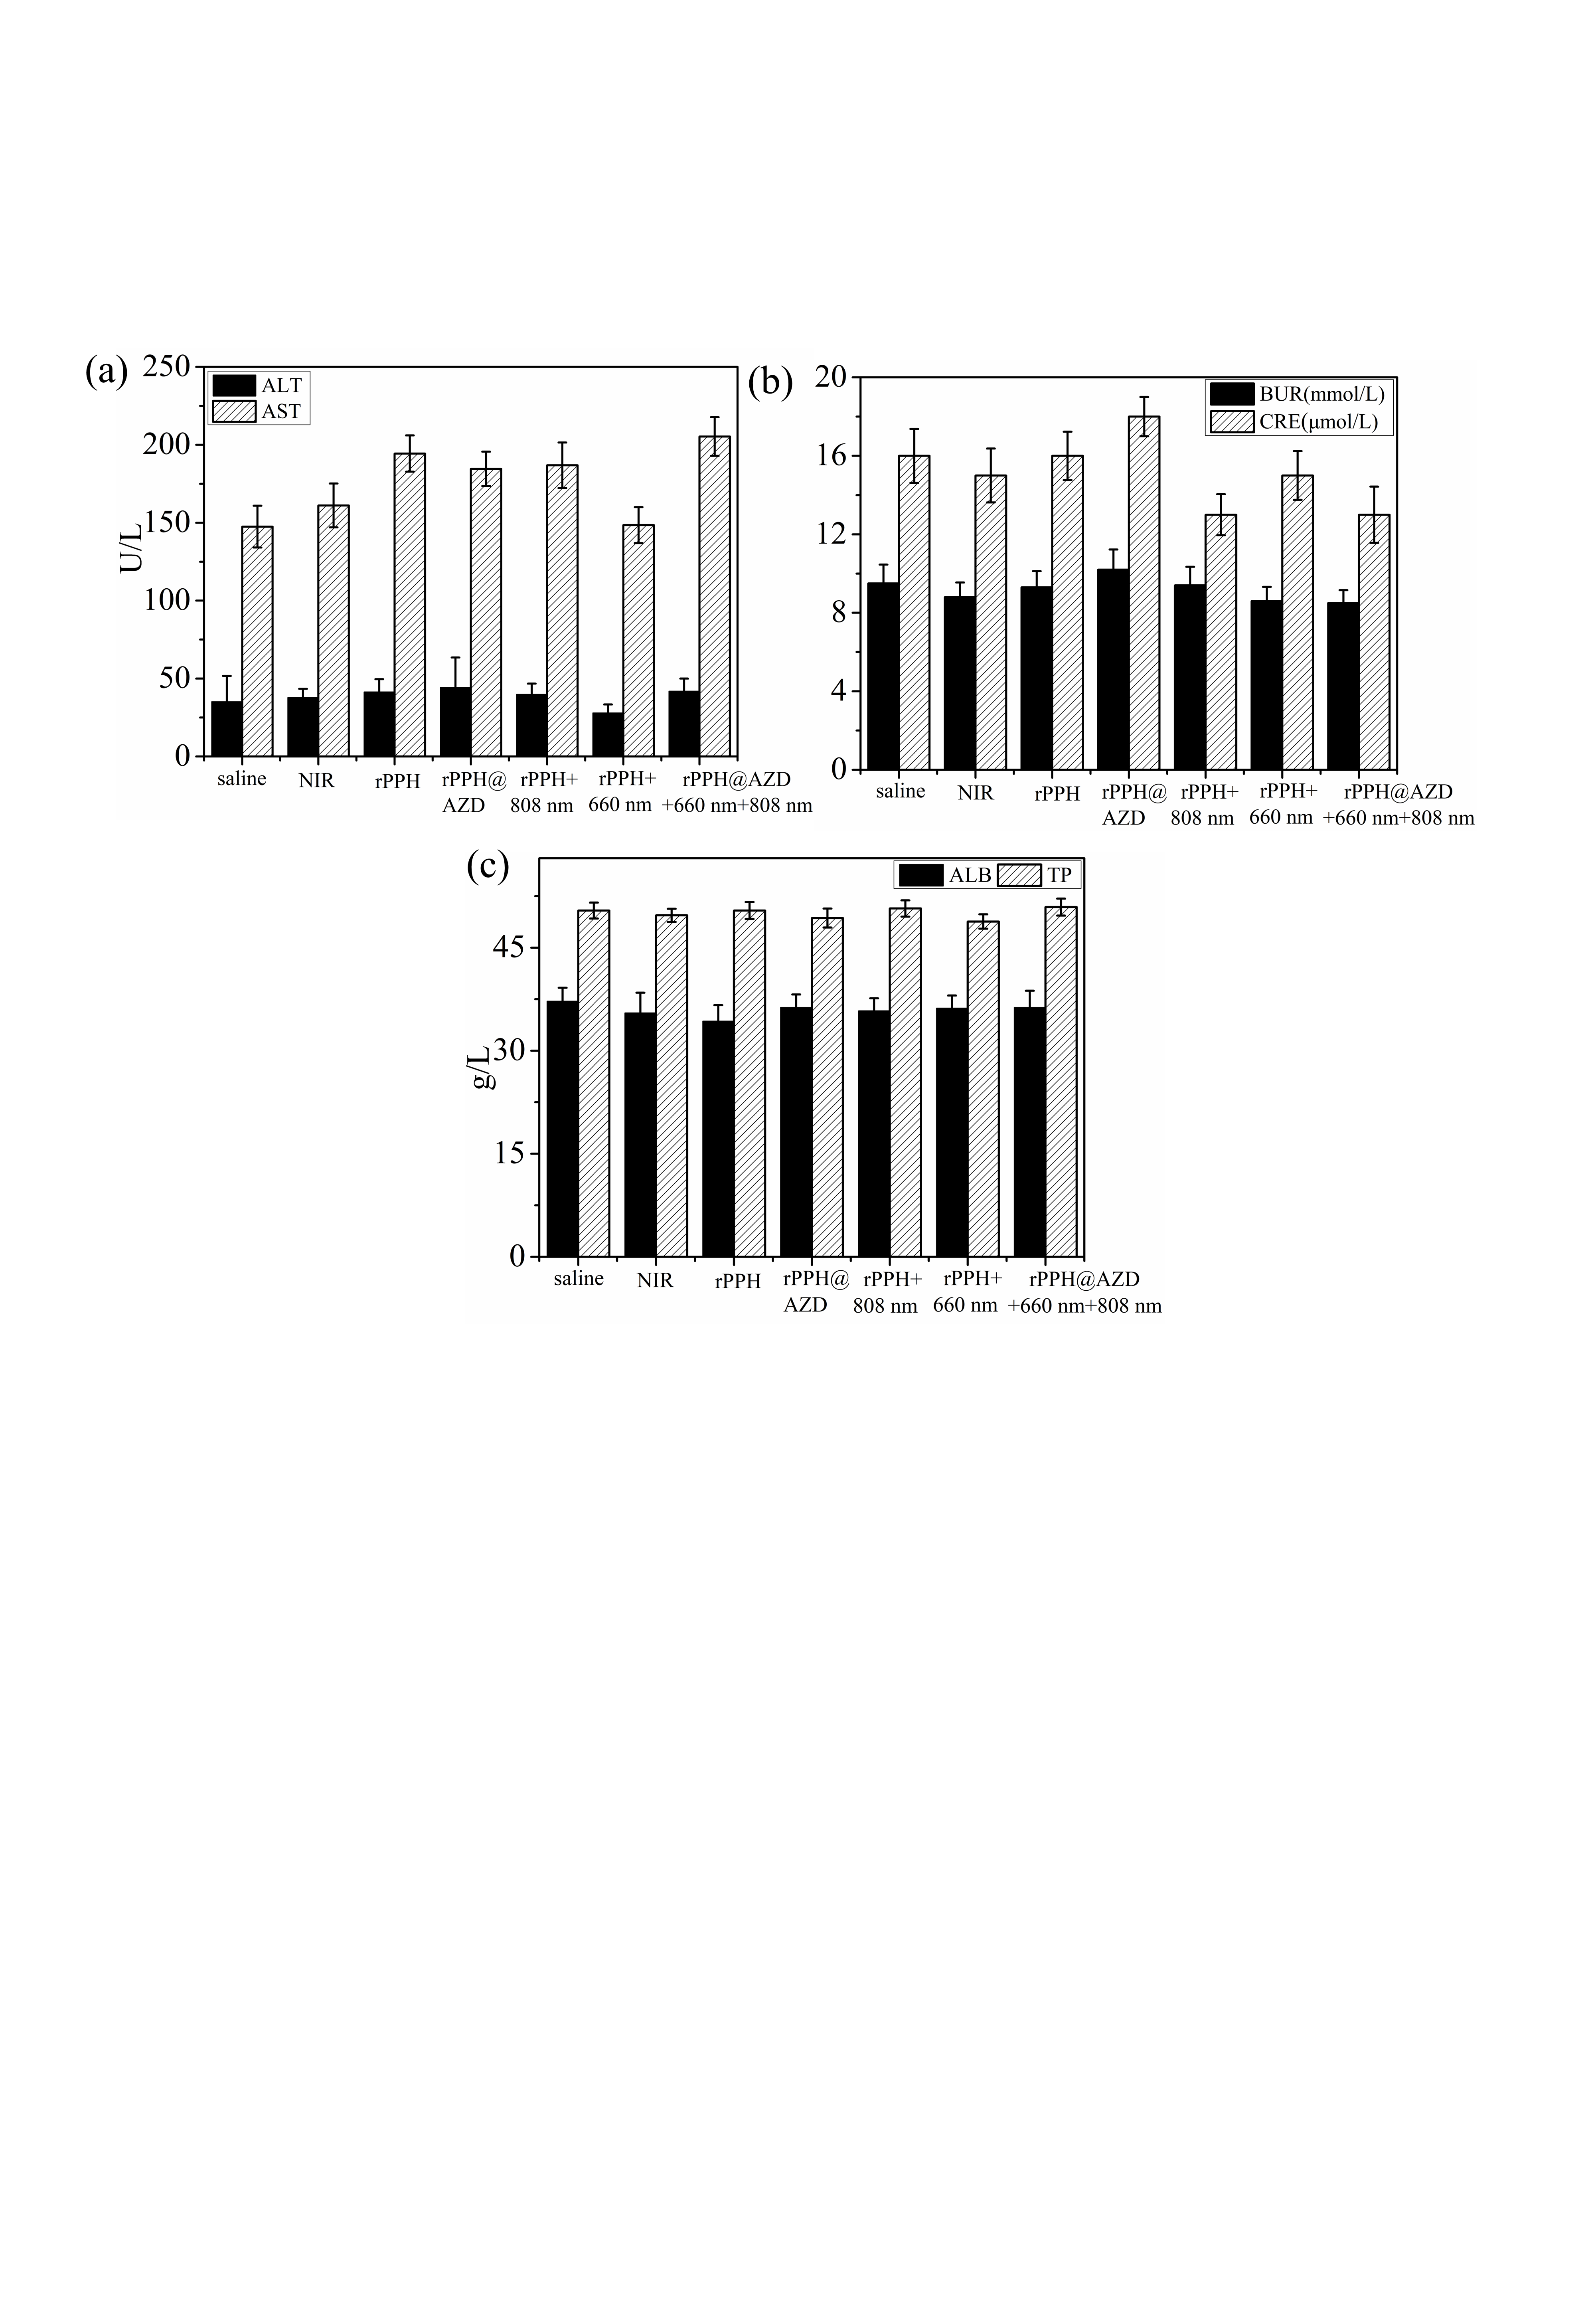


**Fig. S4.** Liver and kidney indices of mice subjected to various treatments after 14 days.


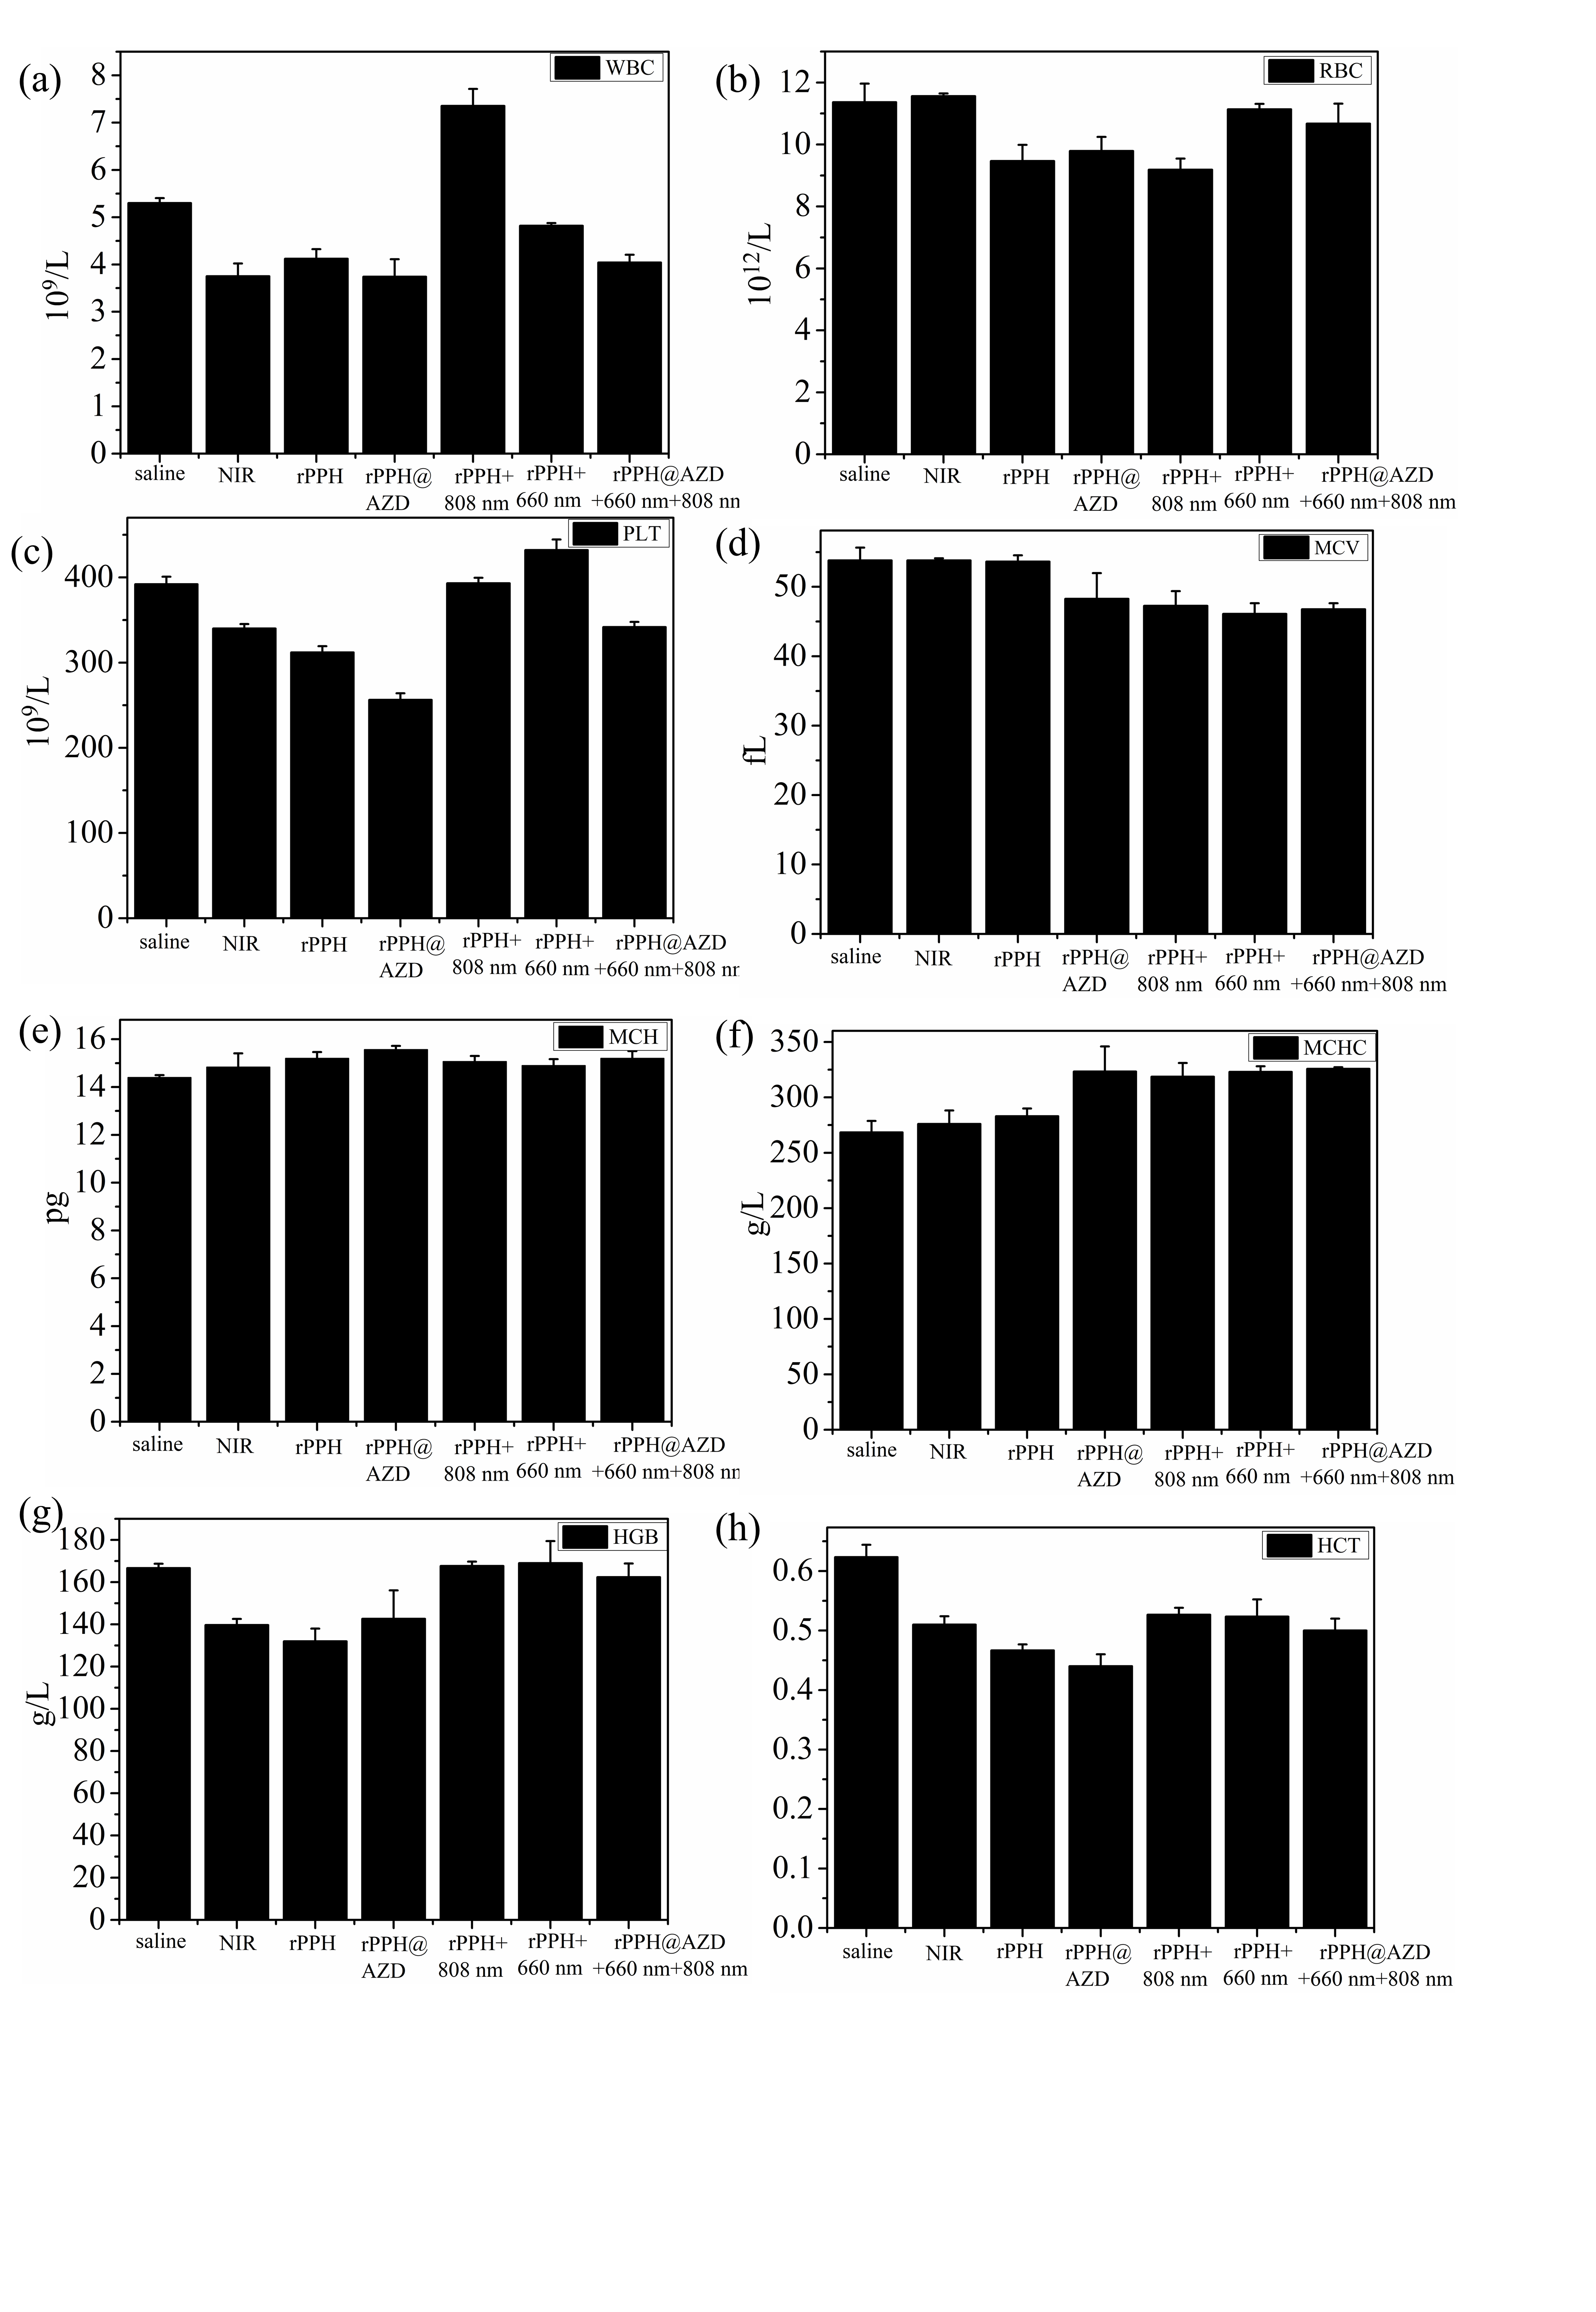


**Fig. S5.** Blood indices of mice subjected to various treatments after 14 days.
